# Supplementary material
Source: Elsevier journal article supplement (https://www.sciencedirect.com/science/article/pii/S1885585717300841)
Supplement: mmc1 [file mmc1.pdf]

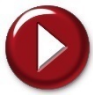

## Supplementary material

### Analysis of the Association Between Electrocardiographic P-wave Characteristics and Atrial Fibrillation in the REGICOR Study

**TABLE 1 OF THE SUPPLEMENTARY MATERIAL**

Baseline Characteristics of the Participants in the Study According to Their Attendance at the Follow-up Visit

|                           | Attendance at the follow up visit |                | <i>P</i> |
|---------------------------|-----------------------------------|----------------|----------|
|                           | Yes<br>n = 6424                   | No<br>n = 2986 |          |
| Age, y                    | 52.7 ± 12.4                       | 58.4 ± 14.3    | <.001    |
| Sex, % male               | 46.4                              | 51.5           | <.001    |
| SBP, mmHg                 | 126.5 ± 19.6                      | 132.8 ± 21.6   | <.001    |
| DBP, mmHg                 | 78.9 ± 10.0                       | 79.3 ± 10.4    | .090     |
| Hypertension treatment, % | 16.4                              | 26.3           | <.001    |
| Glucose level, mg/dL      | 98.6 ± 22.8                       | 105.4 ± 33.1   | <.001    |
| Diabetes treatment, %     | 3.8                               | 8.1            | <.001    |
| LDL cholesterol, mg/dL    | 136.1 ± 36.4                      | 134.5 ± 37.4   | .116     |
| HDL cholesterol, mg/dL    | 54.3 ± 15.09                      | 53.6 ± 15.5    | .289     |
| Triglycerides, mg/dL      | 107.8 ± 67.5                      | 118.0 ± 75.5   | <.001    |
| Cholesterol treatment, %  | 15.7                              | 20.7           | <.001    |

DBP, diastolic blood pressure; HDL, high-density lipoprotein; LDL, low-density lipoprotein; SBP, systolic blood pressure

Unless otherwise indicated, data are expressed as mean ± standard deviation.

**Table 2 of the supplementary material**

Pearson Correlation Coefficient Between P-wave Duration and Other Continuous Variables

|                          | Correlation coefficient | <i>P</i> |
|--------------------------|-------------------------|----------|
| Heart rate               | -0.167                  | .010     |
| Systolic blood pressure  | 0.092                   | .167     |
| Diastolic blood pressure | 0.034                   | .605     |
| Body mass index          | 0.121                   | .062     |

**Table 3 of the supplementary material**

P-wave Duration in Participants With and Without Comorbidities

| Comorbidity            | No       | Yes      | <i>P</i> |
|------------------------|----------|----------|----------|
| Hypertension           | 123 ± 19 | 129 ± 20 | .020     |
| Hypertension treatment | 123 ± 20 | 130 ± 19 | .005     |
| Diabetes               | 126 ± 20 | 130 ± 19 | .322     |
| Diabetes treatment     | 126 ± 20 | 128 ± 19 | .616     |

Values are expressed as the mean ± standard deviation.

**Table 4 of the supplementary material**

Odds Ratios for Atrial Fibrillation of the Different Electrocardiographic Variables Analyzed (Adjusted for Body Mass Index, Heart Rate and Hypertension; Age- and Sex-matched)

|                                   | N<br>(cases-<br>controls) | OR    | 95%CI        | P    |
|-----------------------------------|---------------------------|-------|--------------|------|
| <b>P-wave duration (msec)</b>     | 240                       | 1.013 | 0.998-1.028  | .088 |
| <i>P-wave duration categories</i> |                           |       |              |      |
| < 110 msec                        | 49 (5-44)                 | 1     |              |      |
| 110-119.9 msec                    | 43 (16-27)                | 5.628 | 1.798-17.613 | .003 |
| 120-129.9 msec                    | 57 (22-35)                | 4.828 | 1.612-14.458 | .005 |
| ≥ 130 msec                        | 91 (37-54)                | 4.760 | 1.670-13.567 | .003 |
| <i>P-wave morphology</i>          |                           |       |              |      |
| Normal                            | 92 (21-71)                | 1     |              |      |
| P-IAB                             | 125 (50-75)               | 1.755 | 0.928-3.320  | .084 |
| A-IAB                             | 23 (9-14)                 | 1.782 | 0.645-4.918  | .265 |
| <b>IAB, partial or advanced</b>   | 148 (59-89)               | 1.759 | 0.945-3.275  | .075 |
| <i>P-wave duration and IAB</i>    |                           |       |              |      |
| < 110 msec                        | 49 (5-44)                 | 1     |              |      |
| 110-119.9 msec                    | 43 (16-27)                | 5.628 | 1.796-17.612 | .003 |
| ≥ 120 msec (P-IAB)                | 125 (50-75)               | 4.783 | 1.722-13.284 | .003 |
| ≥ 120 msec + A-IAB                | 23 (9-14)                 | 4.809 | 1.326-17.437 | .017 |
| <i>Advanced vs partial IAB</i>    |                           |       |              |      |
| ≥ 120 msec (P-IAB)                | 125 (50-75)               | 1     |              |      |
| ≥ 120 + A-IAB                     | 23 (9-14)                 | 1.003 | 0.387-2.601  | .995 |

95%CI, 95% confidence interval; A-IAB, advanced IAB; IAB, interatrial blocks; OR, odds ratio; P-IAB, partial IAB.

**Full Roster of REGICOR Investigators:**

i) IMIM (*Instituto Hospital del Mar de Investigaciones Médicas*), Barcelona, Spain

Investigators: Jaume Marrugat, Roberto Elosua, Montserrat Fitó, María Grau, Irene Roman.

Técnicos: Gemma Blanchart, Anna Blasco, Marta Cabañero, Oscar Díaz, Sandra Farré, Yolanda Ferrer, Leny Franco, Sonia Gaixas, David Giménez, Esmeralda Gómez, Saray Heredia, Sílvia Martín, Núria Massegú, Daniel Muñoz, Judith Peñafiel, Isaac Subirana, Susana Tello, Joan Vila, Maria del Mar Vila.

ii) Hospital Universitari de Girona Dr. Josep Trueta, Girona, Spain

Investigators: Joan Sala, Jaime Aboal, Xavier Albert, Daniel Bosch, Rafael Masiá, Gabriel Vázquez

Technician: Isabel Ramió

iii) *Institut d'Investigació en Atenció Primària Jordi Gol (IDIAP Jordi Gol); Unitat d'Investigació en Atenció Primària, Institut Català de Salut (ICS), Institut d' Investigació Biomèdica de Girona (IdIBGi)*, Girona, Spain

Investigators: Rafel Ramos, Carlos Cerezo, Ferran Cordón, Ruth Martí, Pascual Solanas

Technicians: Bruna Camps, Monti Piqué, Martina Sidera, Anna Torrens

iv) *Direcció General de Planificació i Avaluació, Servei d'Informació i Estudis, Regió Sanitària de Girona; Departament de Salut, Generalitat de Catalunya*, Girona, Spain

Investigators: Ricard Tresserras, Rosa Gispert, Anna Puigdefàbregas, Glòria Ribas, M<sup>a</sup> Teresa Faixeda

v) *Corporació de Salut del Maresme i La Selva*, Hospital de Blanes, Blanes, Girona, Spain

Investigators: Núria Constans, Rita Massa, Guillermo Paluzie, Mariona Vendrell, Alberto Zamora

vi) *Serveis de Saluts Integrats, Baix Empordà, Hospital de Palamós*, Palamós, Girona, Spain

Investigators: Feliu Antúnez, Francina Bassó, Jordi Corderch, José M<sup>a</sup> Inoriza, Angels Massabeu

vii) *Fundació Privada Hospital Sant Jaume de Olot*, Olot, Girona, Spain

Investigators: Mariona Barcons, Josep Bisbe, Pere Cortés, Rosa Piulats

viii) *Hospital General de Santa Caterina (Girona), Institut d'Assistència Sanitària*

Investigador: Jose Carlos Guerra

ix) *Hospital de Figueres, Fundació Salut Empordà*, Figueres, Girona, Spain

Investigators: José Cucurull, Marco Paz, Montse Saguer, Pere Tomàs, Manel Vicente

x) *Clínica Girona*, Girona, Spain

Investigators: Alfons Bonet, Núria Porcar

xi) Cross-sectional studies: Júlia Alguacil, Joan Ayats, Ernest Belmonte, Montse Capdevila, Marta Carreras, Àngels Carrión, Isabel Cateura, Mary Jane Chu, Albert Clarà, Sara Colom, Juan Antonio de los Cobos, Montserrat Fauria, M<sup>a</sup> José Gámez, Emma García, Anna García-Elías, Gemma Hidalgo, Carme Jiménez, Anna Julià, Mireia Juncà, Dolors Juvinyà, Olga Levy, Roser Mas, Judit Mir, Fernando Montesinos, Assumpta Ortiz, Núria Pagès, Araceli Pena, Anna Planas, Mireia Ponsà, Núria Puig, Ariadna Puignau, Anna Rafols, Martina Sidera, Isabel Soler, Anna Triadó, Isabel Turró
